# Supplementary material for: GC, GC/MS Analysis, and Biological Effects of Essential Oils from Thymus mastchina and Elettaria cardamomum
Source: MDPI journal article supplement (doi:10.3390/plants11233213), 2022-11-23
Supplement: s1 [file s1]

## Supplementary Materials

for

# GC, GC/MS analysis and biological effects of essential oils from *Thymus mastichina* and *Elettaria cardamomum*

Nenad L. Vukovic <sup>1\*</sup>, Milena D. Vukic <sup>1</sup>, Ana D. Obradovic <sup>2</sup>, Milos M. Matic <sup>2</sup>, Lucia Galovičová <sup>3</sup>, Miroslava Kačániová <sup>3,4</sup>

<sup>1</sup> Department of Chemistry, Faculty of Science, University of Kragujevac, 34000 Kragujevac, Serbia

<sup>2</sup> Department of Biology and Ecology, Faculty of Science, University of Kragujevac, 34000 Kragujevac, Serbia

<sup>3</sup> Institute of Horticulture, Faculty of Horticulture and Landscape Engineering, Slovak University of Agriculture, Tr. A. Hlinku 2, 94976 Nitra, Slovakia

<sup>4</sup> Department of Bioenergy, Food Technology and Microbiology, Institute of Food Technology and Nutrition, University of Rzeszow, 4 Zelwerowicza St, 35601 Rzeszow, Poland

\*Correspondence: nenad.vukovic@pmf.kg.ac.rs; Tel.: +381336223

## Content

**Figure S1.** GC/MS chromatogram of series of n-alkanes (C<sub>7</sub>–C<sub>35</sub>) for calculation of Kovats retention indices for *T. mastichina* EO.

**Figure S2.** GC/MS chromatogram of *T. mastichina* EO for calculation of Kovats retention indices.

**Figure S3.** GC/MS chromatogram of series of n-alkanes (C<sub>7</sub>–C<sub>35</sub>) for calculation of Van Den Dool retention indices for *T. mastichina* EO.

**Figure S4.** GC/MS chromatogram of *T. mastichina* EO for calculation of Van Den Dool retention indices.

**Figure S5.** GC/MS chromatogram of series of n-alkanes (C<sub>7</sub>–C<sub>35</sub>) for calculation of Kovats retention indices for *E. cardamomum* EO.

**Figure S6.** GC/MS chromatogram of *E. cardamomum* EO for calculation of Kovats retention indices.

**Figure S7.** GC/MS chromatogram of series of n-alkanes (C<sub>7</sub>–C<sub>35</sub>) for calculation of Van Den Dool retention indices for *E. cardamomum* EO.

**Figure S8.** GC/MS chromatogram of *E. cardamomum* EO for calculation of Van Den Dool retention indices.

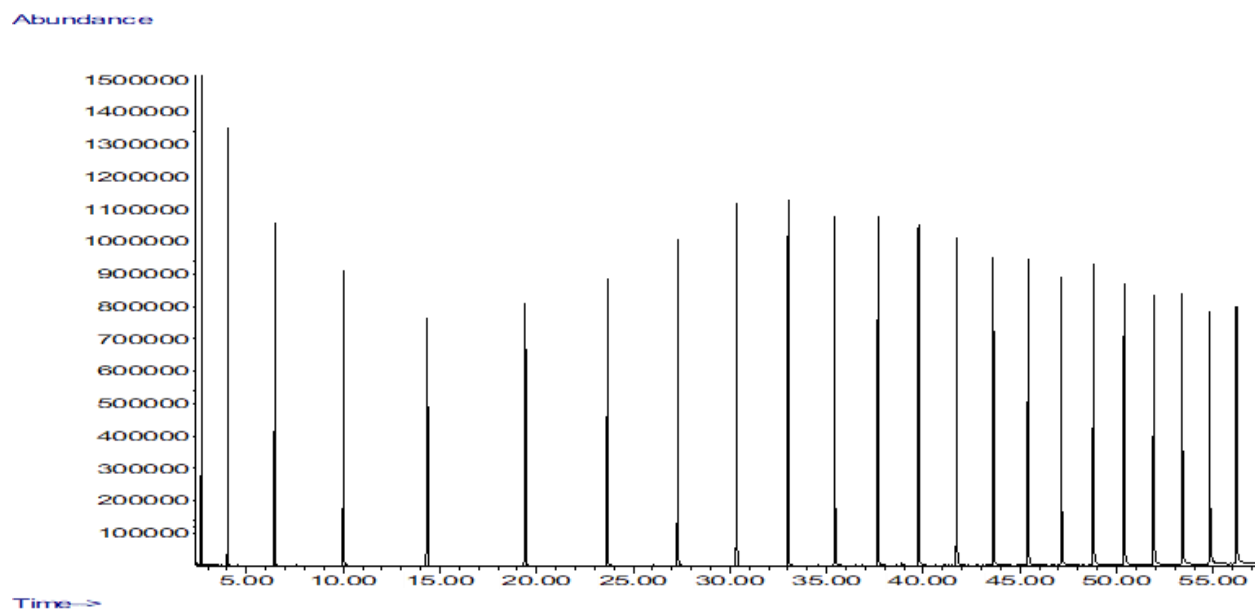

**Figure S1.** GC/MS chromatogram of series of n-alkanes (C<sub>7</sub>–C<sub>35</sub>) for calculation of Kovats retention indices for *T. mastichina* EO.

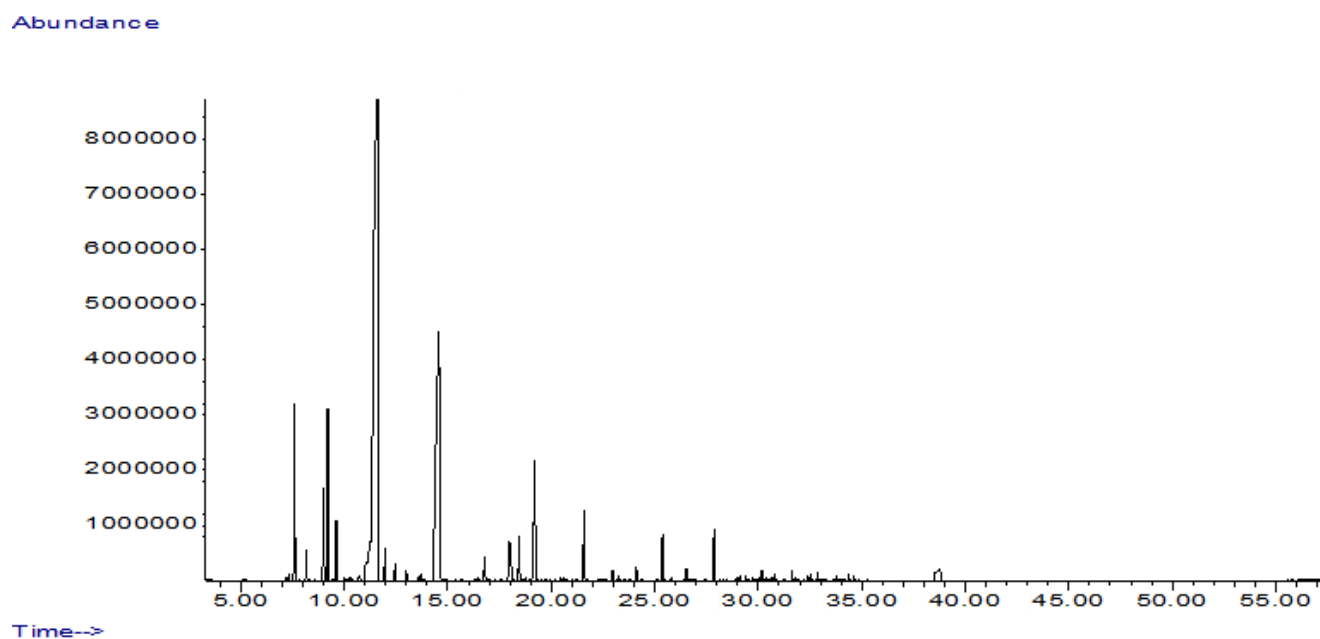

**Figure S2.** GC/MS chromatogram of *T. mastichina* EO for calculation of Kovats retention indices.

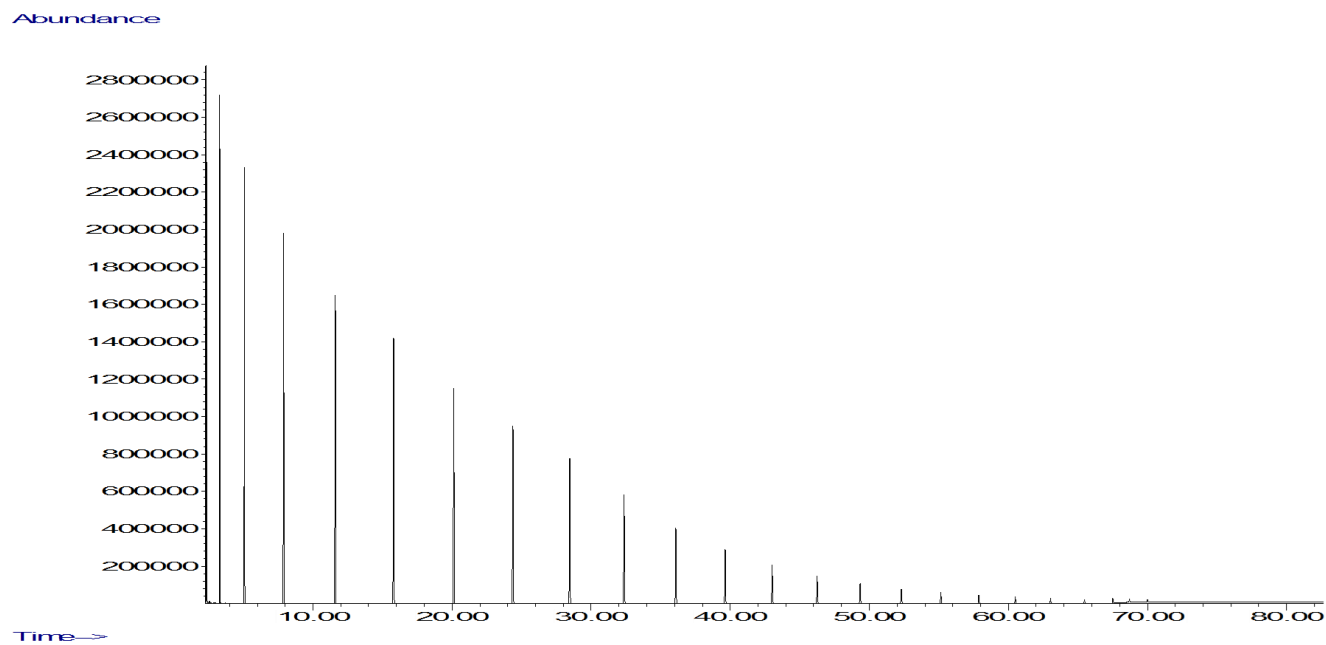

**Figure S3.** GC/MS chromatogram of series of n-alkanes (C<sub>7</sub>–C<sub>35</sub>) for calculation of Van Den Dool retention indices for *T. mastichina* EO.

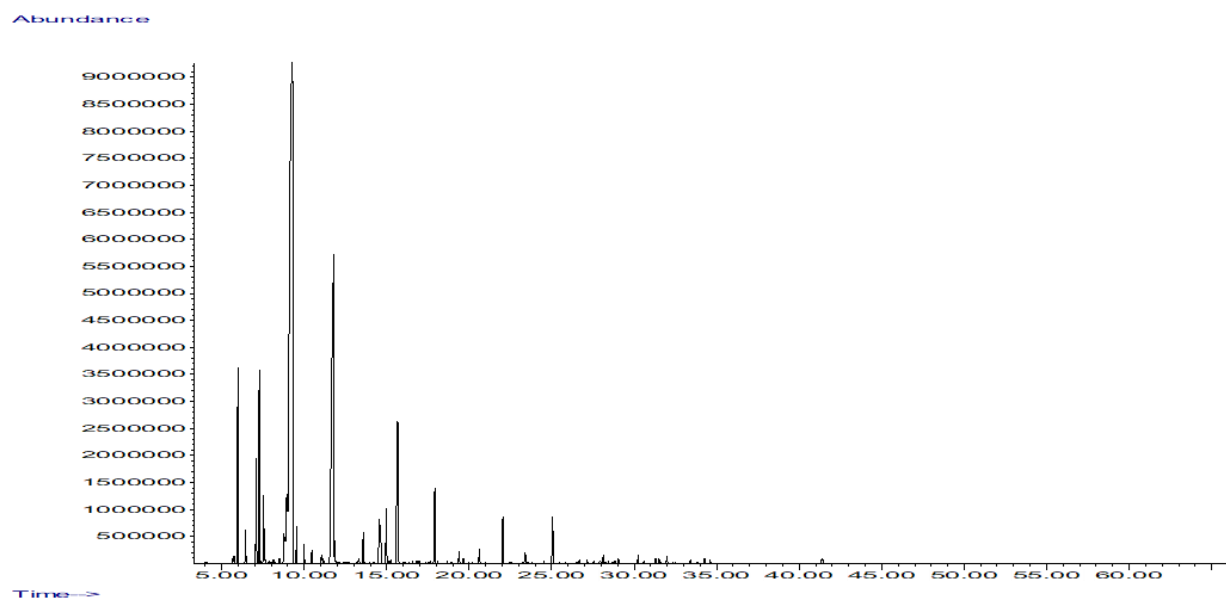

**Figure S4.** GC/MS chromatogram of *T. mastichina* EO for calculation of Van Den Dool retention indices.

Abundance

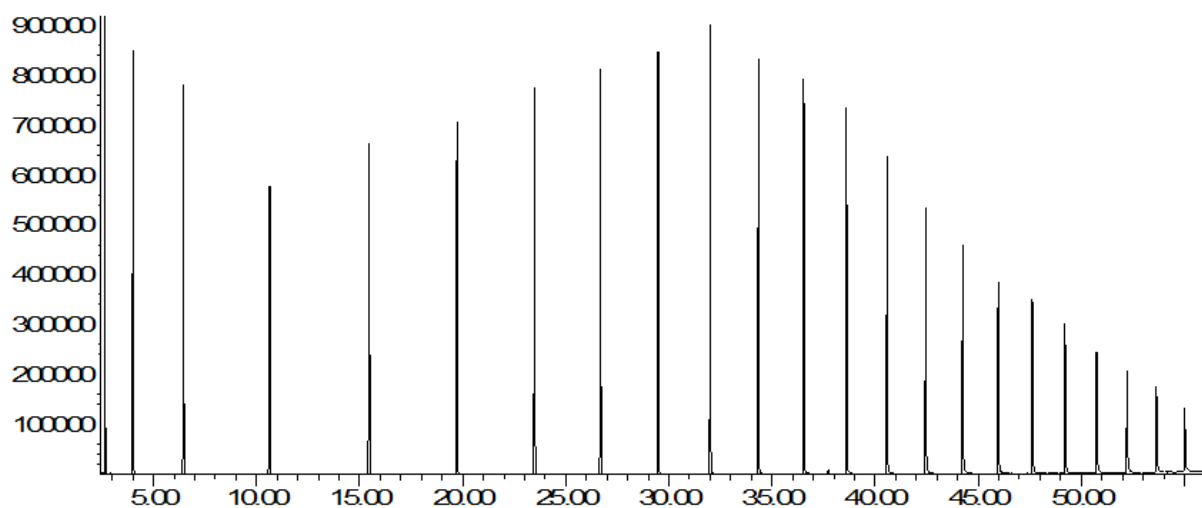

Time→

**Figure S5.** GC/MS chromatogram of series of n-alkanes (C<sub>7</sub>–C<sub>35</sub>) for calculation of Kovats retention indices for *E. cardamomum* EO.

Abundance

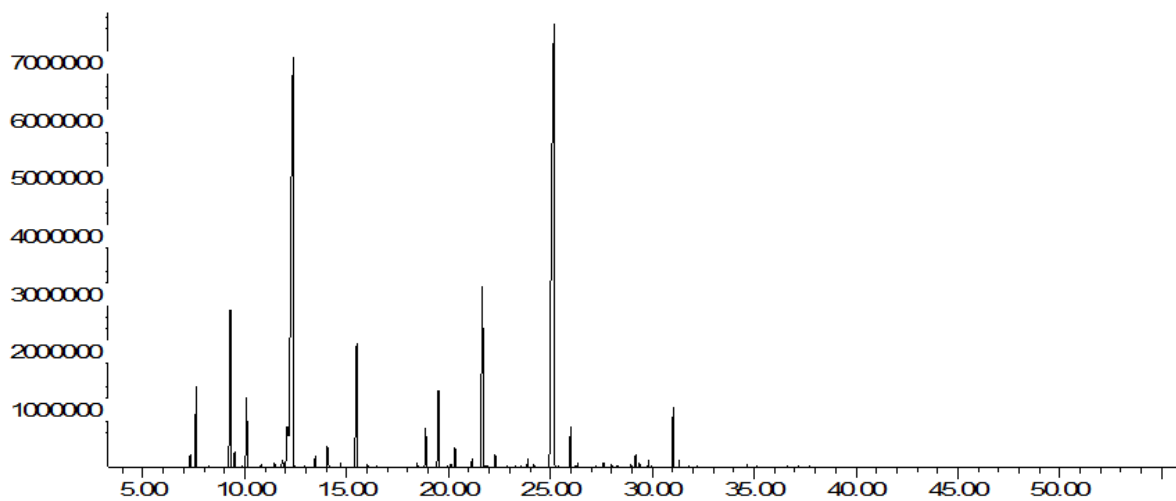

Time→

**Figure S6.** GC/MS chromatogram of *E. cardamomum* EO for calculation of Kovats retention indices.

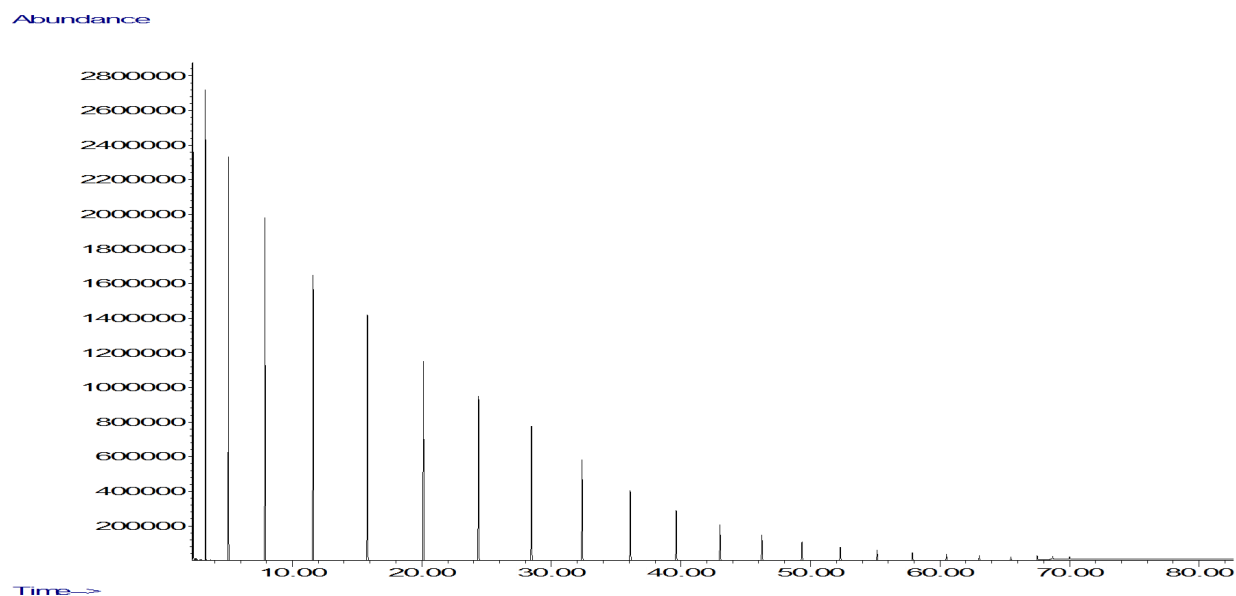

**Figure S7.** GC/MS chromatogram of series of n-alkanes (C<sub>7</sub>-C<sub>35</sub>) for calculation of Van Den Dool retention indices for *E. cardamomum* EO.

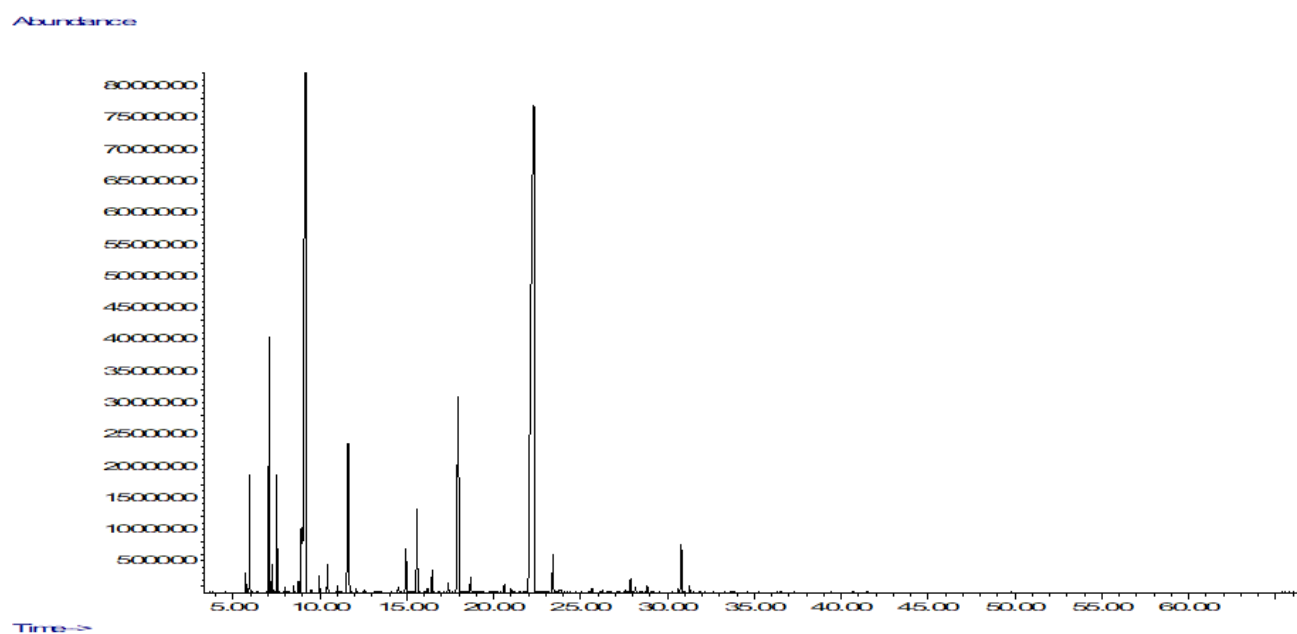

**Figure S8.** GC/MS chromatogram of *E. cardamomum* EO for calculation of Van Den Dool retention indices.
